# Supplementary material for: Development of a Monocyte Activation Test as an Alternative to the Rabbit Pyrogen Test for Mono- and Multi-Component Shigella GMMA-Based Vaccines
Source: MDPI journal article supplement (doi:10.3390/microorganisms9071375), 2021-06-24
Supplement: s1 [file s1]

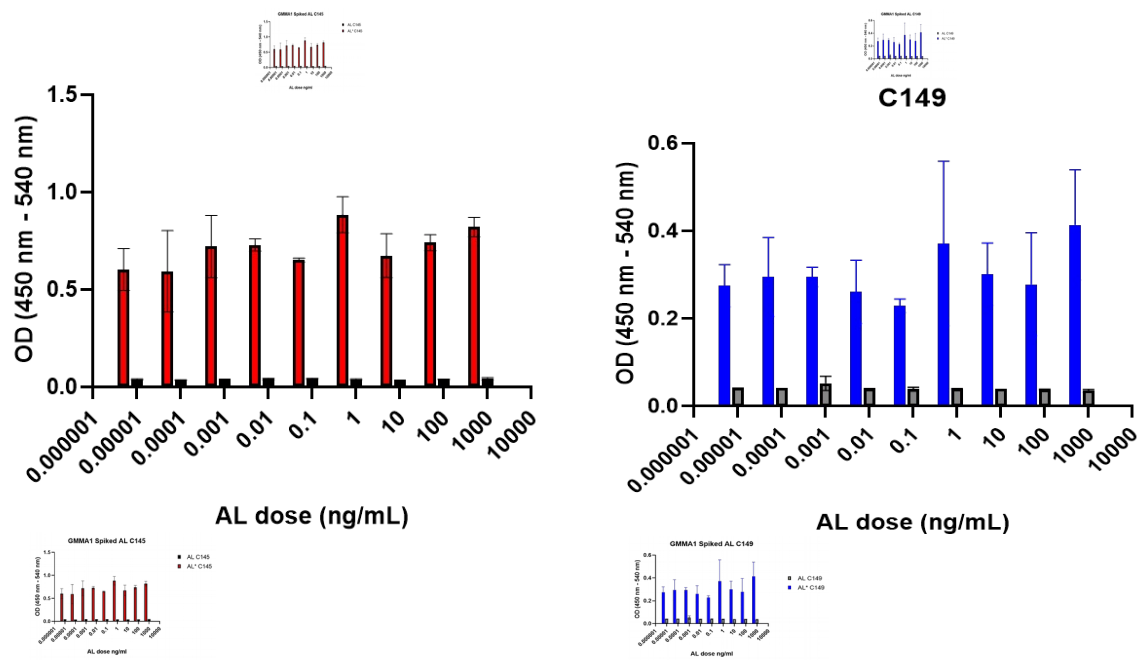

**Figure S1.** Response of PBMCs from two donors, C145 (left) and C149 (right) treated with 10-fold increasing doses of Alhydrogel only (grey bars) or Alhydrogel with spiked endotoxin (red and blue bars) at a final concentration of 0.1 IU/mL.

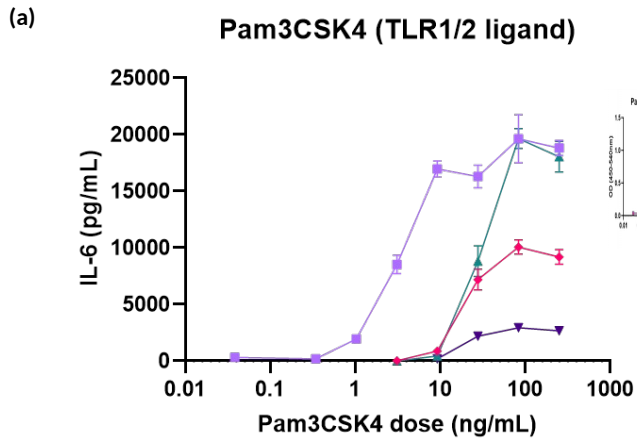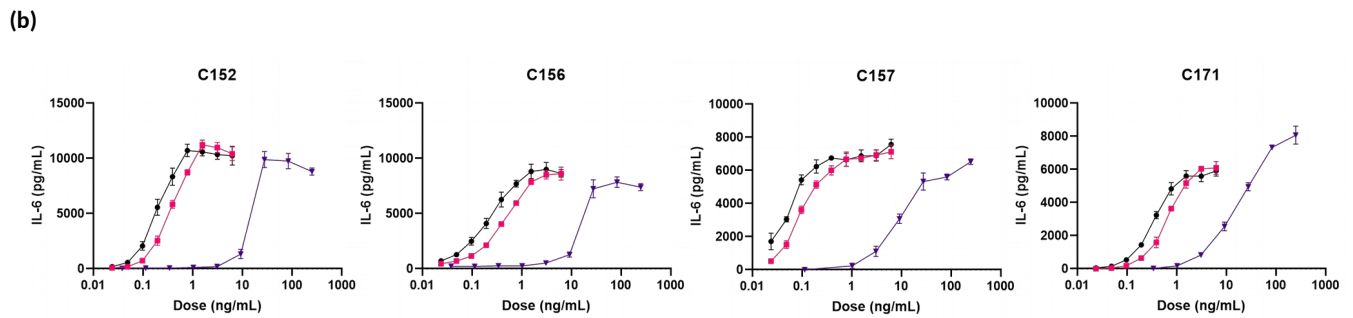

**Figure S2. (a)** Dose response curves of PBMCs from four donors (C162 - pink diamonds, C163 - light purple squares, C164 - green triangles, C165 - dark purple inverted triangles) treated with toll-like receptor (TLR)1/2 agonist Pam3CSK4. Nine three-fold dilutions of Pam3CSK4 between 0.04 and 250 ng/ml were tested. **(b)** Dose response curves of PBMCs from four representative donors; C152, 156, 157 and 171 treated with *S. sonnei* GMMA drug product (DP, 1790GAHB FF01, black circles), *S. sonnei* 1790 GMMA drug substance (DS, pink squares) and Pam3CSK4 (purple inverted triangles). The highest concentration of *S. sonnei* GMMA DP and DS was 6.25 ng/mL for all illustrated donors.

**Table S1.** MAT data showing relative pyrogenicity units (RPU) and statistical analysis for GMMA with Pam3CSK4 as a reference standard

| IL-6 ANALYSIS        |                     |                          | Donors |       |       |       |
|----------------------|---------------------|--------------------------|--------|-------|-------|-------|
|                      |                     |                          | C152   | C156  | C157  | C171  |
| Pam3CSK4 AS STANDARD | 1790GAHB<br>FF01 DP | RPU                      | 8.03   | 15.71 | 22.66 | 52.71 |
|                      |                     | Non-parallelism          | 0.128  | 0.000 | 0.016 | 0.000 |
|                      |                     | Non-linearity            | 0.962  | 0.402 | 0.000 | 0.036 |
|                      |                     | Eq. ratio with standard  | 0.845  | 0.430 | 0.828 | 1.779 |
|                      |                     | Correlation r (weighted) | 0.934  | 0.856 | 0.921 | 0.914 |
|                      | 1790 GMMA DS        | RPU                      | 4.58   | 8.45  | 10.45 | 25.66 |
|                      |                     | Non-parallelism          | 0.866  | 0.000 | 0.002 | 0.000 |
|                      |                     | Non-linearity            | 0.057  | 0.012 | 0.000 | 0.029 |
|                      |                     | Eq. ratio with standard  | 1.016  | 0.462 | 0.813 | 1.686 |
|                      |                     | Correlation r (weighted) | 0.943  | 0.867 | 0.932 | 0.942 |

**Table S2.** MAT data showing relative pyrogenicity units (RPU) and statistical analysis for different batches of *S. sonnei* GMMA drug product (DP) with a reference *S. sonnei* DP batch as standard

| IL-6 ANALYSIS             |                   |                                   | Donors |       |       |       |
|---------------------------|-------------------|-----------------------------------|--------|-------|-------|-------|
|                           |                   |                                   | C162   | C163  | C164  | C165  |
| 1709GAHB FF01 AS STANDARD | 1790GAHB SH15-001 | RPU                               | 0.18   | 0.14  | 0.18  | 0.20  |
|                           |                   | Non-parallelism ( <i>p</i> value) | 0.148  | 0.353 | 0.583 | 0.014 |
|                           |                   | Non-linearity ( <i>p</i> value)   | 0.071  | 0.126 | 0.146 | 0.539 |
|                           |                   | Eq. ratio (standard = 1)          | 1.427  | 1.133 | 0.933 | 1.568 |
|                           |                   | Correlation <i>r</i> (weighted)   | 0.743  | 0.878 | 0.899 | 0.853 |
|                           | BATCH A           | RPU                               | 0.43   | 0.62  | 0.75  | 0.80  |
|                           |                   | Non-parallelism ( <i>p</i> value) | 0.002  | 0.053 | 0.000 | 0.000 |
|                           |                   | Non-linearity ( <i>p</i> value)   | 0.138  | 0.325 | 0.000 | 0.003 |
|                           |                   | Eq. ratio (standard = 1)          | 0.508  | 1.254 | 1.693 | 1.977 |
|                           |                   | Correlation <i>r</i> (weighted)   | 0.732  | 0.929 | 0.801 | 0.839 |
|                           | BATCH B           | RPU                               | 0.41   | 0.58  | 0.56  | 0.55  |
|                           |                   | Non-parallelism ( <i>p</i> value) | 0.011  | 0.108 | 0.004 | 0.196 |
|                           |                   | Non-linearity ( <i>p</i> value)   | 0.336  | 0.149 | 0.000 | 0.336 |
|                           |                   | Eq. ratio (standard = 1)          | 0.572  | 1.284 | 1.390 | 1.254 |
|                           |                   | Correlation <i>r</i> (weighted)   | 0.786  | 0.833 | 0.884 | 0.865 |
|                           | BATCH C           | RPU                               | 0.65   | 1.01  | 1.10  | 1.32  |
|                           |                   | Non-parallelism ( <i>p</i> value) | 0.002  | 0.784 | 0.934 | 0.000 |
|                           |                   | Non-linearity ( <i>p</i> value)   | 0.659  | 0.282 | 0.056 | 0.002 |
|                           |                   | Eq. ratio (standard = 1)          | 0.517  | 1.039 | 0.991 | 1.763 |
|                           |                   | Correlation <i>r</i> (weighted)   | 0.795  | 0.862 | 0.923 | 0.865 |

**Table S3** MAT data showing relative pyrogenicity units (RPU) and statistical analysis of accelerated degradation *Shigella* 4-component GMMA drug product samples

| IL-6 ANALYSIS                       |                              |                                   | Donors |       |       |       |       |       |       |       |       |       |
|-------------------------------------|------------------------------|-----------------------------------|--------|-------|-------|-------|-------|-------|-------|-------|-------|-------|
|                                     |                              |                                   | C162   | C163  | C164  | C165  | C168  | C169  | C170  | C171  | C152  | C154  |
| SHIGELLA 4-COMPONENT DP AS STANDARD | SHIGELLA 4-COMPONENT DP 25°C | RPU                               | 0.53   | 0.67  | 0.82  | 0.73  | 0.88  | 0.47  | 0.55  | 0.58  | 0.79  | 1.10  |
|                                     |                              | Non-parallelism ( <i>p</i> value) | 0.079  | 0.763 | 0.011 | 0.629 | 0.158 | 0.053 | 0.095 | 0.055 | 0.001 | 0.000 |
|                                     |                              | Non-linearity ( <i>p</i> value)   | 0.941  | 0.601 | 0.923 | 0.996 | 0.971 | 0.108 | 1.000 | 0.098 | 0.011 | 0.000 |
|                                     |                              | Eq. ratio (standard = 1)          | 0.783  | 0.950 | 1.387 | 0.949 | 1.223 | 0.804 | 0.901 | 0.824 | 1.177 | 1.651 |
|                                     |                              | Correlation <i>r</i> (weighted)   | 0.904  | 0.885 | 0.898 | 0.939 | 0.905 | 0.909 | 0.977 | 0.939 | 0.981 | 0.894 |
|                                     | SHIGELLA 4-COMPONENT DP 40°C | RPU                               | 0.13   | 0.20  | 0.20  | 0.19  | 0.42  | 0.09  | 0.17  | 0.12  | 0.12  | 0.30  |
|                                     |                              | Non-parallelism ( <i>p</i> value) | 0.799  | 0.000 | 0.098 | 0.706 | 0.090 | 0.012 | 0.343 | 0.024 | 0.100 | 0.050 |
|                                     |                              | Non-linearity ( <i>p</i> value)   | 1.000  | 0.509 | 0.952 | 0.996 | 0.997 | 0.103 | 1.000 | 1.000 | 0.277 | 0.251 |
|                                     |                              | Eq. ratio (standard = 1)          | 0.963  | 0.604 | 1.313 | 0.952 | 1.184 | 0.829 | 0.952 | 0.829 | 1.130 | 0.871 |
|                                     |                              | Correlation <i>r</i> (weighted)   | 0.906  | 0.906 | 0.861 | 0.932 | 0.952 | 0.969 | 0.988 | 0.970 | 0.964 | 0.972 |

**Table S4** MAT data showing relative pyrogenicity units (RPU) and statistical analysis of mono- and multi-component *Shigella* GMMA drug products with *S. sonnei* GMMA drug substance as a reference standard

| IL-6 ANALYSIS            |               |                                   | Donors |       |       |       |       |       |       |       |       |       |       |       |
|--------------------------|---------------|-----------------------------------|--------|-------|-------|-------|-------|-------|-------|-------|-------|-------|-------|-------|
|                          |               |                                   | C162   | C163  | C164  | C165  | C168  | C169  | C170  | C171  | C152  | C154  | C156  | C157  |
| 1790 GMMA DS AS STANDARD | 1790GAHB FF01 | RPU                               | 1.51   | 0.66  | 1.34  | 1.42  | 1.95  | 1.69  | 1.77  | 1.74  | 1.81  | 1.62  | 2.15  | 1.96  |
|                          |               | Non-parallelism ( <i>p</i> value) | 0.138  | 0.148 | 0.880 | 0.982 | 0.456 | 0.889 | 0.217 | 0.054 | 0.526 | 0.745 | 0.506 | 0.472 |
|                          |               | Non-linearity ( <i>p</i> value)   | 0.198  | 0.065 | 0.059 | 0.032 | 0.565 | 0.353 | 0.252 | 0.569 | 0.042 | 0.003 | 0.840 | 0.256 |
|                          |               | Eq. ratio (standard = 1)          | 1.138  | 0.881 | 0.989 | 0.998 | 0.943 | 1.017 | 1.064 | 0.857 | 0.962 | 1.036 | 0.959 | 1.060 |
|                          |               | Correlation <i>r</i> (weighted)   | 0.950  | 0.939 | 0.955 | 0.940 | 0.966 | 0.903 | 0.986 | 0.957 | 0.973 | 0.924 | 0.971 | 0.949 |
|                          | 4-COMPONENT   | RPU                               | 0.39   | 0.40  | 1.37  | 0.84  | 0.59  | 0.99  | 0.52  | 0.85  | 1.11  | 0.70  | 0.67  | 0.56  |
|                          |               | Non-parallelism ( <i>p</i> value) | 0.115  | 0.000 | 0.000 | 0.000 | 0.000 | 0.123 | 0.002 | 0.000 | 0.000 | 0.000 | 0.000 | 0.000 |
|                          |               | Non-linearity ( <i>p</i> value)   | 0.098  | 0.000 | 0.000 | 0.000 | 0.127 | 0.124 | 0.219 | 0.000 | 0.571 | 0.000 | 0.610 | 0.076 |
|                          |               | Eq. ratio (standard = 1)          | 1.181  | 2.636 | 2.142 | 2.644 | 1.363 | 1.418 | 1.315 | 1.905 | 1.263 | 2.132 | 1.257 | 1.318 |
|                          |               | Correlation <i>r</i> (weighted)   | 0.935  | 0.798 | 0.891 | 0.654 | 0.950 | 0.755 | 0.949 | 0.893 | 0.973 | 0.853 | 0.988 | 0.946 |

**Table S5** MAT data showing relative pyrogenicity units (RPU) and statistical analysis of *Shigella* 4-component GMMA drug product with *Shigella* 4-component GMMA drug substance as standard

| IL-6 ANALYSIS                       |                         |                                 | Donors |       |       |       |       |       |       |       |       |       |
|-------------------------------------|-------------------------|---------------------------------|--------|-------|-------|-------|-------|-------|-------|-------|-------|-------|
|                                     |                         |                                 | C162   | C163  | C164  | C165  | C168  | C169  | C170  | C171  | C152  | C154  |
| SHIGELLA 4-COMPONENT DS AS STANDARD | SHIGELLA 4-COMPONENT DP | RPU                             | 2.09   | 1.27  | 1.64  | 2.52  | 1.18  | 1.54  | 1.44  | 1.65  | 1.08  | 0.98  |
|                                     |                         | Non-parallelism (p value)       | 0.009  | 0.300 | 0.057 | 0.002 | 0.074 | 0.010 | 0.056 | 0.001 | 0.020 | 0.964 |
|                                     |                         | Non-linearity (p value)         | 0.112  | 0.815 | 0.678 | 0.994 | 0.092 | 0.716 | 1.000 | 0.943 | 0.339 | 0.128 |
|                                     |                         | Eq. ratio (standard = 1)        | 0.909  | 1.239 | 1.349 | 1.450 | 0.909 | 1.321 | 1.124 | 1.406 | 1.180 | 1.003 |
|                                     |                         | Correlation <i>r</i> (weighted) | 0.867  | 0.866 | 0.875 | 0.919 | 0.980 | 0.933 | 0.977 | 0.939 | 0.962 | 0.977 |

**Table S6** MAT data showing relative pyrogenicity units (RPU) and statistical analysis of accelerated degradation *Shigella* 4-component GMMA drug substance samples

| IL-6 ANALYSIS                           |                               |                                   | Donors |       |       |       |       |       |       |       |
|-----------------------------------------|-------------------------------|-----------------------------------|--------|-------|-------|-------|-------|-------|-------|-------|
|                                         |                               |                                   | C162   | C163  | C164  | C165  | C168  | C169  | C170  | C171  |
| SHIGELLA 4-COMPONENT DS -80 AS STANDARD | SHIGELLA 4-COMPONENT DS -20°C | RPU                               | 0.73   | 1.15  | 0.78  | 0.56  | 0.70  | 1.58  | 0.68  | 0.90  |
|                                         |                               | Non-parallelism ( <i>p</i> value) | 0.062  | 0.062 | 0.026 | 0.000 | 0.039 | 0.029 | 0.800 | 0.150 |
|                                         |                               | Non-linearity ( <i>p</i> value)   | 0.042  | 0.169 | 0.121 | 0.194 | 0.106 | 0.837 | 1.000 | 0.989 |
|                                         |                               | Eq. ratio (standard = 1)          | 0.856  | 1.510 | 0.847 | 0.572 | 0.659 | 1.889 | 0.959 | 1.162 |
|                                         |                               | Correlation <i>r</i> (weighted)   | 0.958  | 0.793 | 0.967 | 0.917 | 0.793 | 0.747 | 0.854 | 0.946 |
|                                         | SHIGELLA 4-COMPONENT DS 4°C   | RPU                               | 0.61   | 0.77  | 0.62  | 0.49  | 0.57  | 1.13  | 0.55  | 0.78  |
|                                         |                               | Non-parallelism ( <i>p</i> value) | 0.001  | 0.463 | 0.066 | 0.000 | 0.001 | 0.047 | 0.389 | 0.071 |
|                                         |                               | Non-linearity ( <i>p</i> value)   | 0.000  | 0.973 | 0.753 | 0.430 | 0.027 | 0.064 | 0.966 | 0.629 |
|                                         |                               | Eq. ratio (standard = 1)          | 0.680  | 0.858 | 0.844 | 0.651 | 0.502 | 1.663 | 0.875 | 0.825 |
|                                         |                               | Correlation <i>r</i> (weighted)   | 0.876  | 0.841 | 0.960 | 0.945 | 0.772 | 0.729 | 0.858 | 0.936 |
|                                         | SHIGELLA 4-COMPONENT DS 37°C  | RPU                               | 0.82   | 0.69  | 0.53  | 0.53  | 0.79  | 0.41  | 0.60  | 0.60  |
|                                         |                               | Non-parallelism ( <i>p</i> value) | 0.185  | 0.136 | 0.053 | 0.034 | 0.014 | 0.029 | 0.337 | 0.586 |
|                                         |                               | Non-linearity ( <i>p</i> value)   | 0.180  | 0.924 | 0.330 | 0.083 | 0.868 | 0.750 | 1.000 | 0.990 |
|                                         |                               | Eq. ratio (standard = 1)          | 1.122  | 0.700 | 0.755 | 0.703 | 0.731 | 0.680 | 1.168 | 1.074 |
|                                         |                               | Correlation <i>r</i> (weighted)   | 0.949  | 0.797 | 0.885 | 0.863 | 0.911 | 0.852 | 0.860 | 0.926 |
